# Supplementary material for: Concise total syntheses of two flavans and structure revision assisted by quantum NMR calculations
Source: Royal Society of Chemistry journal article supplement (doi:10.1039/d2ob00634k), 2022-01-01

## Supporting Information

### Concise Total Syntheses of Two Flavans and Structure Revision Assisted by Quantum NMR Calculations

Tingting Zhou,<sup>ac†</sup> Anquan Zheng,<sup>ac†</sup> Wenge Zhang,<sup>a</sup> Xiuxiang Lu,<sup>a</sup> Huiyu Chen<sup>\*cd</sup> and Haibo Tan<sup>\*ab</sup>

---

<sup>a</sup> Key Laboratory of Plant Resources Conservation and Sustainable Utilization, Guangdong Provincial Key Laboratory of Applied Botany, South China Botanical Garden, Chinese Academy of Sciences, Guangzhou 510650, People's Republic of China.

<sup>b</sup> Key Laboratory of Tropical Medicinal Resource Chemistry of Ministry of Education, Hainan Normal University, Haikou, 571158, People's Republic of China.

<sup>c</sup> School of Pharmacy and Bioengineering, Chongqing University of Technology, Chongqing 400054, People's Republic of China.

<sup>d</sup> School of Chemical and Environmental Engineering, Shanghai Institute of Technology, Shanghai 201418, People's Republic of China.

† Co-first authors on the paper.

## Contents

|                                                                                                                                          |    |
|------------------------------------------------------------------------------------------------------------------------------------------|----|
| 1. Experimental Procedures .....                                                                                                         | 4  |
| 1.1 General experimental procedures.....                                                                                                 | 4  |
| 1.1.1 Spectra recorded in different deuterium solvents:.....                                                                             | 4  |
| 1.1.2 The following is an explanation of the abbreviations: .....                                                                        | 4  |
| 1.1 X-ray crystallographic data of flavan <b>1</b> .....                                                                                 | 5  |
| 1.2 X-ray crystallographic analysis of flavan <b>1</b> .....                                                                             | 5  |
| 1.3 The synthetic procedures.....                                                                                                        | 6  |
| 1.3.1 The synthesis of 2,3-dihydroxycinnamaldehyde <b>11</b> .....                                                                       | 6  |
| 1.3.2 The synthesis of flavan <b>1</b> .....                                                                                             | 7  |
| 1.3.4 The synthesis of cinnamaldehyde <b>18c</b> .....                                                                                   | 8  |
| 1.3.5 The synthesis of cinnamaldehyde <b>12</b> .....                                                                                    | 8  |
| 1.3.6 The synthesis of flavan <b>8</b> .....                                                                                             | 9  |
| 2. The Comparison of $^1\text{H}$ and $^{13}\text{C}$ NMR Data of Natural and Synthetic Flavan <b>1</b> in $\text{DMSO-}d_6$ .....       | 10 |
| 3. The Comparison of $^1\text{H}$ and $^{13}\text{C}$ NMR Data of Flavan <b>9</b> and Synthetic Flavan <b>8</b> in $\text{CDCl}_3$ ..... | 11 |
| 4. (GIAO) DFT $^{13}\text{C}$ NMR Calculations of Flavans <b>9</b> and <b>8</b> .....                                                    | 12 |
| 5. The Copies of the NMR Spectra .....                                                                                                   | 15 |
| Figure 1. $^1\text{H}$ NMR Spectrum (500 MHz, $\text{DMSO-}d_6$ ) of Flavan <b>1</b> .....                                               | 15 |
| Figure 2. $^{13}\text{C}$ NMR Spectrum (125 MHz, $\text{DMSO-}d_6$ ) of Flavan <b>1</b> .....                                            | 15 |
| Figure 3. HSQC Spectrum of Flavan <b>1</b> .....                                                                                         | 16 |
| Figure 4. $^1\text{H-}^1\text{H}$ COSY Spectrum of Flavan <b>1</b> .....                                                                 | 16 |
| Figure 5. HMBC Spectrum of Flavan <b>1</b> .....                                                                                         | 17 |
| Figure 6. NOESY Spectrum of Flavan <b>1</b> .....                                                                                        | 17 |
| Figure 7. $^1\text{H}$ NMR Spectrum (500 MHz, $\text{CDCl}_3$ ) of Flavan <b>8</b> .....                                                 | 18 |
| Figure 8. $^{13}\text{C}$ NMR Spectrum (125 MHz, $\text{CDCl}_3$ ) of Flavan <b>8</b> .....                                              | 18 |
| Figure 9. HSQC Spectrum of Flavan <b>8</b> .....                                                                                         | 19 |
| Figure 10. $^1\text{H-}^1\text{H}$ COSY Spectrum of Flavan <b>8</b> .....                                                                | 19 |
| Figure 11. HMBC Spectrum of Flavan <b>8</b> .....                                                                                        | 20 |
| Figure 12. NOESY Spectrum of Flavan <b>8</b> .....                                                                                       | 20 |

|                                                                                                         |    |
|---------------------------------------------------------------------------------------------------------|----|
| Figure 13. $^1\text{H}$ NMR Spectrum (500 MHz, $\text{CDCl}_3$ ) of Compound <b>17c</b> .....           | 21 |
| Figure 14. $^{13}\text{C}$ NMR Spectrum (125 MHz, $\text{CDCl}_3$ ) of Compound <b>17c</b> .....        | 21 |
| Figure 15. $^1\text{H}$ NMR Spectrum (500 MHz, $\text{CDCl}_3$ ) of Compound <b>18c</b> .....           | 22 |
| Figure 16. $^{13}\text{C}$ NMR Spectrum (125 MHz, $\text{CD}_3\text{OD}$ ) of Compound <b>18c</b> ..... | 22 |
| Figure 17. $^1\text{H}$ NMR Spectrum (500 MHz, $\text{CD}_3\text{OD}$ ) of Compound <b>12</b> .....     | 23 |
| Figure 18. $^{13}\text{C}$ NMR Spectrum (125 MHz, $\text{CD}_3\text{OD}$ ) of Compound <b>12</b> .....  | 23 |
| Figure 19. $^1\text{H}$ NMR Spectrum (500 MHz, $\text{CD}_3\text{OD}$ ) of Compound <b>11</b> .....     | 24 |
| Figure 20. $^{13}\text{C}$ NMR Spectrum (125 MHz, $\text{CD}_3\text{OD}$ ) of Compound <b>11</b> .....  | 24 |

# 1. Experimental Procedures

## 1.1 General experimental procedures

All air and moisture sensitive reactions were carried out under a nitrogen atmosphere with dry solvents under anhydrous conditions. All solvents were reagent grade, and used without further purification. Thin layer chromatography (TLC) analysis was performed on a 0.25 mm Qingdao silica gel plate (60 F-254) with ultraviolet irradiation (254 nm) and stained with vanillin. Silica gel (ZCX-II) (200-300 mesh) flash column chromatography using Qingdao Ocean Chemical Co., Ltd., China products.  $^1\text{H}$  and  $^{13}\text{C}$  NMR spectra were recorded on a Bruker Advance 500 MHz spectrometer. ( $^1\text{H}$ : 500 MHz,  $^{13}\text{C}$ : 125 MHz). All NMR chemical shifts were referenced to residual solvent peaks as an internal standard and recorded in ppm.

### 1.1.1 Spectra recorded in different deuterium solvents:

$\text{CDCl}_3$  ( $^1\text{H}$  NMR: 7.28 ppm,  $^{13}\text{C}$  NMR: 77.0 ppm);

$\text{CD}_3\text{OD}$  ( $^1\text{H}$  NMR: 3.33 ppm,  $^{13}\text{C}$  NMR: 47.6 ppm);

$\text{CD}_3\text{COCD}_3$  ( $^1\text{H}$  NMR: 2.05 ppm,  $^{13}\text{C}$  NMR: 30.0, 206.3 ppm);

$\text{DMSO-}d_6$  ( $^1\text{H}$  NMR: 2.50 ppm,  $^{13}\text{C}$  NMR: 39.5 ppm).

### 1.1.2 The following is an explanation of the abbreviations:

Multiplicity: s = singlet, d = doublet, t = triplet, q = quartet, m = multiplet. EA = ethyl acetate. ACN = acetonitrile. PTSA = *p*-toluenesulfonic acid. PPTS = pyridinium 4-toluenesulfonate. DMSO = dimethyl sulfoxide. DHP = 3,4-dihydro-2H-pyran. EDDA = ethylenediamine diacetate.

All coupling constants *J* are quoted in Hz. High resolution mass spectra (HRMS) were obtained on an IonSpec QFT mass spectrometer with ESI ionization. Heating mantle was used as the heat source, when reactions required heating.

## 1.1 X-ray crystallographic data of flavan 1

The single crystal X-ray diffraction data of flavan 1 was collected by the method of CuK $\alpha$  radiation using XtaLAB AFC12 (RINC): Kappa single crystal diffractometer. The crystal was kept at 99.99(10) K during data collection.

## 1.2 X-ray crystallographic analysis of flavan 1.

---

**Table 1 Crystal data and structure refinement for flavan 1**

---

|                                       |                                                 |
|---------------------------------------|-------------------------------------------------|
| Identification code                   | Flavan 1_collect                                |
| Empirical formula                     | C <sub>34</sub> H <sub>32</sub> O <sub>10</sub> |
| Formula weight                        | 600.59                                          |
| Temperature/K                         | 99.99(10)                                       |
| Crystal system                        | monoclinic                                      |
| Space group                           | I2/a                                            |
| <i>a</i> /Å                           | 15.5676(5)                                      |
| <i>b</i> /Å                           | 13.8531(3)                                      |
| <i>c</i> /Å                           | 26.8877(10)                                     |
| $\alpha$ /°                           | 90                                              |
| $\beta$ /°                            | 99.841(3)                                       |
| $\gamma$ /°                           | 90                                              |
| Volume/Å <sup>3</sup>                 | 5713.3(3)                                       |
| <i>Z</i>                              | 8                                               |
| $\rho_{\text{calc}}$ /cm <sup>3</sup> | 1.396                                           |
| $\mu$ /mm <sup>-1</sup>               | 0.857                                           |
| F(000)                                | 2528.0                                          |
| Crystal size/mm <sup>3</sup>          | 0.3 × 0.05 × 0.05                               |
| Radiation                             | CuK $\alpha$ ( $\lambda$ = 1.54184)             |

|                                                  |                                                                                  |
|--------------------------------------------------|----------------------------------------------------------------------------------|
| 2 $\Theta$ range for data collection/ $^{\circ}$ | 6.674 to 148.608                                                                 |
| Index ranges                                     | $-16 \leq h \leq 19$ , $-17 \leq k \leq 13$ , $-33 \leq l \leq 31$               |
| Reflections collected                            | 15091                                                                            |
| Independent reflections                          | 5654 [ $R_{\text{int}}^{\circ} = 0.0335$ , $R_{\text{sigma}}^{\circ} = 0.0411$ ] |
| Data/restraints/parameters                       | 5654/0/469                                                                       |
| Goodness-of-fit on $F^2$                         | 1.057                                                                            |
| Final R indexes [ $I \geq 2\sigma(I)$ ]          | $R_1^{\circ} = 0.0610$ , $wR_2^{\circ} = 0.1490$                                 |
| Final R indexes [all data]                       | $R_1^{\circ} = 0.0845$ , $wR_2^{\circ} = 0.1618$                                 |
| Largest diff. peak/hole/ $e\text{\AA}^{-3}$      | 0.20/-0.29                                                                       |

---

### 1.3 The synthetic procedures

#### 1.3.1 The synthesis of 2,3-dihydroxycinnamaldehyde **11**

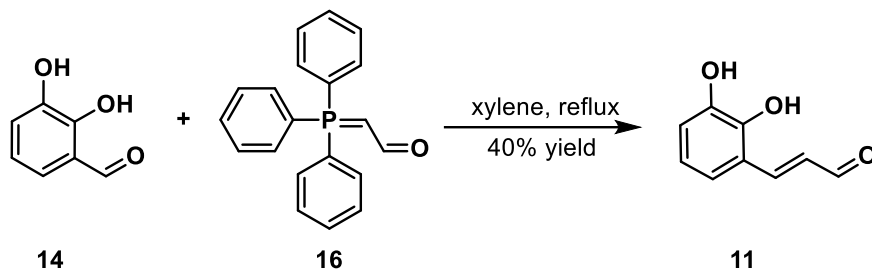

2,3-Dihydroxybenzaldehyde **14** (500 mg, 3.62 mmol) and formylmethylene triphenylphosphorane **16** (1.32 g, 4.35 mmol) were dissolved in xylene (20 mL). The resulting mixture was heated to 100  $^{\circ}\text{C}$  in an oil bath and stirred for 6 h at that temperature under nitrogen atmosphere. After cooling to room temperature, the reaction mixture was directly purified by 15 cm flash column chromatography (silica gel, hexane:EtOAc = 5:1 to 3:1) to provide the product **11** (237 mg, 40% yield) as a yellow solid powder.  $^1\text{H}$  NMR (500 MHz,  $\text{CD}_3\text{OD}$ ):  $\delta$  9.60 (d,  $J = 7.9$  Hz, 1H), 7.92 (d,  $J = 15.9$  Hz, 1H), 7.05 (d,  $J = 8.9$  Hz, 1H), 6.90-6.79 (m, 2H), 6.72 (s, 1H).  $^{13}\text{C}$  NMR (125 MHz,  $\text{CD}_3\text{OD}$ ):  $\delta$  195.5, 150.2, 146.1, 145.4, 128.0, 121.2, 119.4, 119.1, 117.1. HRMS (ESI)  $m/z$ :  $[\text{M} + \text{H}]^+$  calcd for  $\text{C}_9\text{H}_9\text{O}_3$ , 165.0546, found 165.0546.

### 1.3.2 The synthesis of flavan **1**

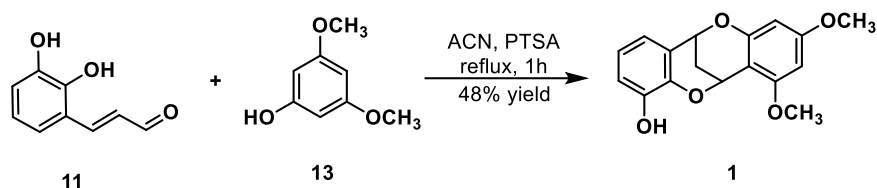

2,3-Dihydroxycinnamaldehyde **11** (72 mg, 0.44 mmol) and phloroglucinol **13** (68 mg, 0.44 mmol) were dissolved in ACN (3 mL), and PTSA (7.6 mg, 0.04 mmol) were then added. The resulting mixture was heated to 80 °C in an oil bath and stirred for 1 h at that temperature. After most of the starting material was consumed, the mixture was cooled to room temperature, extracted with EtOAc (3 × 25 mL), washed with brine, and concentrated in vacuum. The crude product was purified by flash column chromatography (silica gel, hexane:CH<sub>2</sub>Cl<sub>2</sub> = 3:1) to afford **1** (63 mg, 48% yield) as a white solid powder. <sup>1</sup>H NMR (500 MHz, DMSO-*d*<sub>6</sub>): δ 9.00 (s, 1H), 6.80 (d, *J* = 7.1 Hz, 1H), 6.69 (t, *J* = 8.3 Hz, 2H), 6.11 (s, 1H), 5.97 (s, 1H), 5.62 (s, 1H), 5.34 (s, 1H), 3.80 (s, 3H), 3.67 (s, 3H), 2.16 (d, *J* = 14.1 Hz, 1H), 2.09 (d, *J* = 14.1 Hz, 1H). <sup>13</sup>C NMR (125 MHz, DMSO): δ 161.9, 159.3, 155.0, 146.3, 142.3, 122.5, 121.4, 120.1, 116.6, 103.6, 93.4, 91.9, 67.2, 61.5, 56.2, 55.6, 26.5. HRMS (ESI) *m/z*: [M + H]<sup>+</sup> calcd for C<sub>17</sub>H<sub>17</sub>O<sub>5</sub>, 301.1071, found 301.1083.

### 1.3.3 The synthesis of cinnamaldehyde **17c**

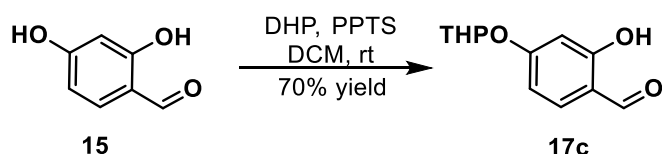

2,4-Dihydroxybenzaldehyde **15** (500 mg, 3.6 mmol) and PPTS (90 mg, 0.36 mmol) were dissolved in anhydrous CH<sub>2</sub>Cl<sub>2</sub> (15 mL). Then, DHP (365 mg, 4.3 mmol) was added. The reaction mixture was stirred at room temperature until most of the ingredients were consumed. The mixture was then extracted with CH<sub>2</sub>Cl<sub>2</sub> (3 × 25 mL), washed with brine, and concentrated in vacuum. The crude product was purified by flash column chromatography (silica gel, hexane:CH<sub>2</sub>Cl<sub>2</sub> = 1:2) to afford **17c** (557 mg, 70% yield) as a colorless liquid. <sup>1</sup>H NMR (500 MHz, CDCl<sub>3</sub>): δ 11.38 (s, 1H), 9.74 (s, 1H), 7.45 (d, *J* = 8.6 Hz, 1H), 6.75-6.48 (m, 2H), 5.52 (s, 1H), 3.98-3.76 (m, 1H), 3.64

(d,  $J = 10.6$  Hz, 1H), 1.86 (t,  $J = 68.5$  Hz, 6H).  $^{13}\text{C}$  NMR (125 MHz,  $\text{CDCl}_3$ ):  $\delta$  194.6, 164.3, 164.1, 135.3, 115.7, 109.4, 103.6, 96.2, 62.2, 29.9, 25.0, 18.4. HRMS (ESI)  $m/z$ :  $[\text{M} + \text{H}]^+$  calcd for  $\text{C}_{12}\text{H}_{15}\text{O}_4$ , 223.0965, found 223.0979.

### 1.3.4 The synthesis of cinnamaldehyde 18c

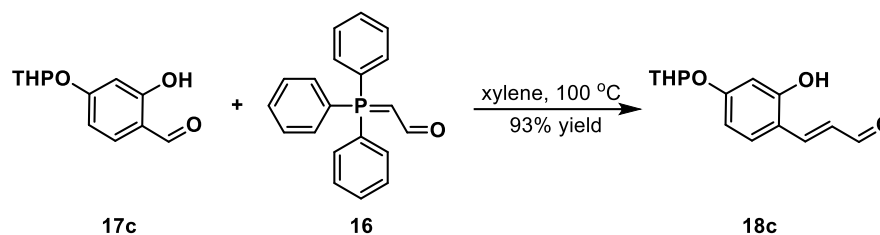

THP-ether aldehyde **17c** (557 mg, 2.5 mmol) and formylmethylene triphenylphosphorane **16** (912 mg, 3.0 mmol) were dissolved in xylene (15 mL). The resulting mixture was heated to 100 °C in an oil bath and stirred for 6 h at that temperature under nitrogen atmosphere. After cooling to room temperature, the reaction mixture was directly purified by 15 cm long flash column chromatography (silica gel, hexane:EtOAc = 10:1 to 5:1) to afford the product **18c** (580 mg, 93% yield) as a palm red solid powder.  $^1\text{H}$  NMR (500 MHz,  $\text{CDCl}_3$ ):  $\delta$  9.64 (d,  $J = 8.0$  Hz, 1H), 7.73 (d,  $J = 15.9$  Hz, 1H), 7.45 (d,  $J = 8.7$  Hz, 1H), 7.00-6.81 (m, 1H), 6.70-6.58 (m, 2H), 5.48 (s, 1H), 3.88 (t,  $J = 10.8$  Hz, 1H), 3.65 (d,  $J = 11.7$  Hz, 1H), 1.87 (t,  $J = 73.9$  Hz, 4H).  $^{13}\text{C}$  NMR (125 MHz,  $\text{CD}_3\text{OD}$ ):  $\delta$  195.6, 161.3, 158.9, 150.5, 130.5, 125.8, 115.1, 108.3, 103.0, 96.1, 61.8, 29.9, 24.8, 18.4. HRMS (ESI)  $m/z$ :  $[\text{M} + \text{Na}]^+$  calcd for  $\text{C}_{14}\text{H}_{16}\text{O}_4\text{Na}$ , 271.0941, found 271.0940.

### 1.3.5 The synthesis of cinnamaldehyde 12

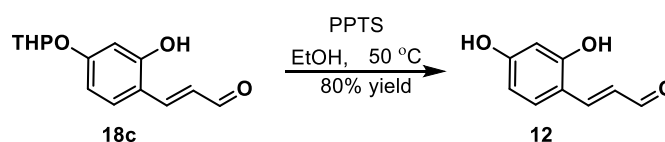

Cinnamaldehyde **18c** (580 mg, 2.34 mmol) and PPTS (59 mg, 0.23 mmol) were dissolved in EtOH (15 mL). The reaction mixture was stirred at room temperature until most of the starting materials are consumed. The mixture was then extracted with EA (3  $\times$  25 mL), washed with brine, and concentrated in vacuum. The crude product was



purified by flash column chromatography (silica gel, hexane:EtOAc = 3:1 to 1:1) to afford **12** (305 mg, 80% yield) as a yellow powder.  $^1\text{H}$  NMR (500 MHz,  $\text{CD}_3\text{OD}$ ):  $\delta$  9.48 (s, 1H), 7.81 (d,  $J = 15.7$  Hz, 1H), 7.39 (d,  $J = 8.3$  Hz, 2H), 6.72 (d,  $J = 7.6$  Hz, 1H), 6.35 (s, 3H).  $^{13}\text{C}$  NMR (125 MHz,  $\text{CD}_3\text{OD}$ ):  $\delta$  195.9, 162.4, 159.5, 151.5, 131.0, 124.6, 113.5, 107.9, 102.1. HRMS (ESI)  $m/z$ :  $[\text{M} + \text{H}]^+$  calcd for  $\text{C}_9\text{H}_9\text{O}_3$ , 165.0546, found 165.0547.

### 1.3.6 The synthesis of flavan **8**

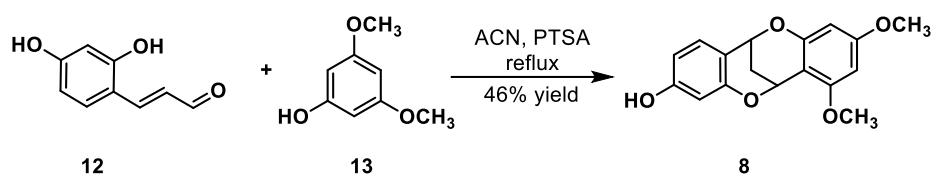

2,4-Dihydroxycinnamaldehyde **12** (126 mg, 0.77 mmol) and phloroglucinol **13** (118 mg, 0.77 mmol) were dissolved in ACN (10 mL), PTSA (15.2 mg, 0.08 mmol) was then added. The resulting mixture was heated to 80 °C in an oil bath and stirred for 4 h at that temperature. After most of the starting material was consumed, the mixture was cooled to room temperature and extracted with EtOAc ( $3 \times 25$  mL), washed with brine, and concentrated in vacuum. The crude product was purified by flash column chromatography (silica gel, hexane:EtOAc = 6:1 to 3:1) to afford **8** (106 mg, 46% yield) as a brown solid powder.  $^1\text{H}$  NMR (500 MHz,  $\text{CDCl}_3$ ):  $\delta$  7.21 (d,  $J = 8.3$  Hz, 1H), 6.40 (d,  $J = 5.8$  Hz, 1H), 6.36 (d,  $J = 2.4$  Hz, 1H), 6.03 (s, 1H), 5.98 (s, 1H), 5.66 (s, 1H), 5.27 (s, 1H), 3.86 (s, 3H), 3.73 (s, 3H), 2.29 (d,  $J = 13.8$  Hz, 1H), 2.18 (d,  $J = 13.7$  Hz, 1H).  $^{13}\text{C}$  NMR (125 MHz,  $\text{CDCl}_3$ ):  $\delta$  161.8, 159.1, 157.9, 154.9, 131.7, 113.8, 108.4, 103.5, 93.0, 91.6, 67.5, 62.0, 55.9, 55.3, 26.8. HRMS (ESI)  $m/z$ :  $[\text{M} + \text{H}]^+$  calcd for  $\text{C}_{17}\text{H}_{17}\text{O}_5$ , 301.1071, found 301.1076.

## 2. The Comparison of $^1\text{H}$ and $^{13}\text{C}$ NMR Data of Natural and Synthetic Flavan 1 in $\text{DMSO-}d_6$

| Position           | Nature sample 1<br>(500 MHz) <sup>a</sup> |                     | Synthetic sample 1<br>(500 MHz) <sup>b</sup> |                     | $\Delta\delta_{\text{H}}$<br>/ppm | $\Delta\delta_{\text{C}}$<br>/ppm |
|--------------------|-------------------------------------------|---------------------|----------------------------------------------|---------------------|-----------------------------------|-----------------------------------|
|                    | $\delta_{\text{H}}$ (mult, $J$ in Hz)     | $\delta_{\text{C}}$ | $\delta_{\text{H}}$ (mult, $J$ in Hz)        | $\delta_{\text{C}}$ |                                   |                                   |
| 2                  | 5.34 (1H, s)                              | 67.2                | 5.34 (1H, s)                                 | 67.2                | 0.00                              | 0.0                               |
| 3a                 | 2.08 (1H, dt,<br>2.5, 14.0)               | 26.5                | 2.09 (1H, dt,<br>2.5, 14.0)                  | 26.5                | +0.01                             | 0.0                               |
| 3b                 | 2.16 (1H, s)                              |                     | 2.16 (1H, s)                                 |                     | 0.00                              |                                   |
| 4                  | 5.62 (1H, s)                              | 61.5                | 5.62 (1H, s)                                 | 61.5                | 0.00                              | 0.0                               |
| 5                  | —                                         | 159.3               | —                                            | 159.3               | —                                 | 0.0                               |
| 6                  | 6.11 (1H, d, 2.3)                         | 91.8                | 6.11 (1H, d, 2.3)                            | 91.9                | 0.00                              | +0.1                              |
| 7                  | —                                         | 161.9               | —                                            | 161.9               | —                                 | 0.0                               |
| 8                  | 5.97 (1H, d, 2.3)                         | 93.4                | 5.97 (1H, d, 2.3)                            | 93.4                | 0.00                              | 0.0                               |
| 9                  | —                                         | 155.0               | —                                            | 155.0               | —                                 | 0.0                               |
| 10                 | —                                         | 103.5               | —                                            | 103.6               | —                                 | +0.1                              |
| 1'                 | —                                         | 122.5               | —                                            | 122.5               | —                                 | 0.0                               |
| 2'                 | —                                         | 146.1               | —                                            | 146.3               | —                                 | +0.2                              |
| 3'                 | —                                         | 142.2               | —                                            | 142.3               | —                                 | +0.1                              |
| 4'                 | 6.70 (1H, d, 1.6)                         | 116.5               | 6.70 (1H, d, 1.6)                            | 116.6               | 0.00                              | +0.1                              |
| 5'                 | 6.68 (1H, d, 7.4)                         | 120.1               | 6.69 (1H, d, 7.4)                            | 120.1               | +0.01                             | 0.0                               |
| 6'                 | 6.80 (1H, dd, 1.5, 7.2)                   | 121.4               | 6.80 (1H, dd, 1.5, 7.2)                      | 121.4               | 0.00                              | 0.0                               |
| 5-OCH <sub>3</sub> | 3.67 (3H, s)                              | 56.1                | 3.67 (3H, s)                                 | 56.2                | 0.00                              | +0.1                              |
| 7-OCH <sub>3</sub> | 3.80 (3H, s)                              | 55.6                | 3.80 (3H, s)                                 | 55.6                | 0.00                              | 0.0                               |

<sup>a</sup>The  $^1\text{H}$  and  $^{13}\text{C}$  NMR data were recorded on a Bruker Avance 500 spectrometer in  $\text{DMSO-}d_6$  and referenced against residual DMSO in  $\text{DMSO-}d_6$  as  $\delta_{\text{H}} = 2.51$  ppm,  $\delta_{\text{C}} = 39.5$  ppm.

<sup>b</sup>The  $^1\text{H}$  and  $^{13}\text{C}$  NMR data were recorded on a Bruker Avance 500 spectrometer in  $\text{DMSO-}d_6$  and referenced against residual DMSO in  $\text{DMSO-}d_6$  as  $\delta_{\text{H}} = 2.51$  ppm,  $\delta_{\text{C}} = 39.5$  ppm.

<sup>c</sup> $\Delta\delta$ /ppm refers the relative difference of each signal between the synthetic and natural samples.

### 3. The Comparison of $^1\text{H}$ and $^{13}\text{C}$ NMR Data of Flavan **9** and Synthetic Flavan **8** in $\text{CDCl}_3$

| Position           | Nature sample<br>Flavan <b>9</b> (500 MHz) <sup>a</sup> |                     | Synthetic sample<br>Flavan <b>8</b> (500 MHz) <sup>b</sup> |                     | $\Delta\delta_{\text{H}}$<br>/ppm <sup>c</sup> | $\Delta\delta_{\text{C}}$<br>/ppm <sup>d</sup> |
|--------------------|---------------------------------------------------------|---------------------|------------------------------------------------------------|---------------------|------------------------------------------------|------------------------------------------------|
|                    | $\delta_{\text{H}}$ (mult, $J$ in Hz)                   | $\delta_{\text{C}}$ | $\delta_{\text{H}}$ (mult, $J$ in Hz)                      | $\delta_{\text{C}}$ |                                                |                                                |
| 2                  | 5.28 (1H, dd, 1.6, 5.4)                                 | 67.4                | 5.27 (1H, dd, 1.6, 5.4)                                    | 67.5                | -0.01                                          | +0.1                                           |
| 3a                 | 2.18 (1H, m)                                            | 26.7                | 2.18 (1H, m)                                               | 26.8                | 0.00                                           | +0.1                                           |
| 3b                 | 2.29 (1H, m)                                            |                     | 2.29 (1H, m)                                               |                     | 0.00                                           | 0.0                                            |
| 4                  | 5.67 (1H, dd, 4.4, 2.8)                                 | 62.1                | 5.66 (1H, dd, 4.4, 2.8)                                    | 62.0                | -0.01                                          | -0.1                                           |
| 5                  | —                                                       | 159.1               | —                                                          | 159.1               | —                                              | 0.0                                            |
| 6                  | 6.04 (1H, d, 2.4)                                       | 91.6                | 6.03 (1H, d, 2.4)                                          | 91.6                | -0.01                                          | 0.0                                            |
| 7                  | —                                                       | 161.9               | —                                                          | 161.8               | —                                              | -0.1                                           |
| 8                  | 5.99 (1H, d, 2.4)                                       | 92.9                | 5.98 (1H, d, 2.4)                                          | 93.0                | -0.01                                          | +0.1                                           |
| 9                  | —                                                       | 154.8               | —                                                          | 154.9               | —                                              | +0.1                                           |
| 10                 | —                                                       | 103.3               | —                                                          | 103.5               | —                                              | +0.2                                           |
| 1'                 | —                                                       | 114.1               | —                                                          | 113.8               | —                                              | -0.3                                           |
| 2'                 | —                                                       | 154.7               | —                                                          | 154.9               | —                                              | +0.2                                           |
| 3'                 | —                                                       | 103.4               | —                                                          | 103.5               | —                                              | +0.1                                           |
| 4'                 | 6.36 (1H, d, 2.4)                                       | 157.4               | 6.36 (1H, d, 2.4)                                          | 157.9               | 0.00                                           | +0.5                                           |
| 5'                 | 6.40 (1H, dd, 8.4, 2.4)                                 | 108.2               | 6.40 (1H, dd, 8.4, 2.4)                                    | 108.4               | 0.00                                           | +0.2                                           |
| 6'                 | 7.22 (1H, d, 8.4)                                       | 131.8               | 7.21 (1H, d, 8.4)                                          | 131.7               | -0.01                                          | -0.1                                           |
| 5-OCH <sub>3</sub> | 3.87 (3H, s)                                            | 55.9                | 3.86 (3H, s)                                               | 55.9                | -0.01                                          | 0.0                                            |
| 7-OCH <sub>3</sub> | 3.73 (3H, s)                                            | 55.3                | 3.73 (3H, s)                                               | 55.3                | 0.00                                           | 0.0                                            |

<sup>a</sup>The  $^1\text{H}$  NMR data was recorded on a Bruker Avance 400 spectrometer in  $\text{CDCl}_3$ , the  $^{13}\text{C}$  NMR data was recorded on a Bruker Avance 100 spectrometer in  $\text{CDCl}_3$ , both of them were referenced against residual  $\text{CHCl}_3$  in  $\text{CDCl}_3$ .

<sup>b</sup>The  $^1\text{H}$  NMR data and  $^{13}\text{C}$  NMR data were recorded on a Bruker Avance 500 spectrometer in  $\text{CDCl}_3$  and referenced against residual  $\text{CHCl}_3$  in  $\text{CDCl}_3$  as  $\delta_{\text{H}} = 7.28$  ppm,  $\delta_{\text{C}} = 77.0$  ppm.

<sup>c</sup> $\Delta\delta/\text{ppm}$  refers the relative difference of each signal between the synthetic and natural samples.

#### 4. (GIAO) DFT $^{13}\text{C}$ NMR Calculations of Flavans **9** and **8**

**Table 1.** Relative energies (kcal/mol) and conformational population (%) for the most stable conformers of **9** and **8** optimized on B3LYP-D3(BJ)/TZVP (IEF-PCM) level of theory

| Compound | Conformer                                                                                   | $\Delta G$ (kcal/mol) | Population (%) |
|----------|---------------------------------------------------------------------------------------------|-----------------------|----------------|
| <b>9</b> | 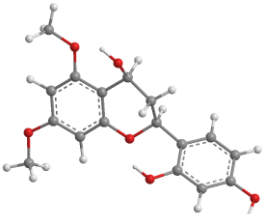<br>9-C1   | 0                     | 58.54          |
|          | <br>9-C2  | 0.422941336           | 28.65          |
|          | <br>9-C3 | 1.089356318           | 9.29           |
|          | <br>9-C4 | 1.706825568           | 3.27           |
|          | <br>9-C5 | 3.463224379           | 0.17           |

|          |                                                                                                                           |             |      |
|----------|---------------------------------------------------------------------------------------------------------------------------|-------------|------|
|          | 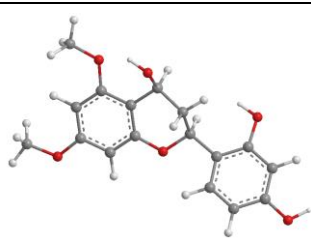 <p style="text-align: center;">9-C6</p> | 3.850397678 | 0.09 |
| <b>8</b> |                                          | 0           | 100  |

**Table 2.** Experimental  $^{13}\text{C}$  NMR data ( $\delta_{\text{C}}$  in ppm) of **9** (proposed in the previous literature, *J. Asian Nat. Prod. Res.*, **2013**, *15*, 979-984) and shielding tensors ( $\delta_{\text{C}}$  in ppm) of **9** and **8** calculated on  $\omega\text{B97x-D}/6\text{-31G}^*/\text{B3LYP-D3(BJ)}/\text{TZVP}$  (IEF-PCM) level of theory

| Compound                                                                                                                        | Nucleus                                                                                                                         | $\delta_{\text{C}}$ exp<br>( $\text{CDCl}_3$ ) | Shielding<br>tensor of <b>9</b> | Shielding<br>tensor of <b>8</b> |
|---------------------------------------------------------------------------------------------------------------------------------|---------------------------------------------------------------------------------------------------------------------------------|------------------------------------------------|---------------------------------|---------------------------------|
| 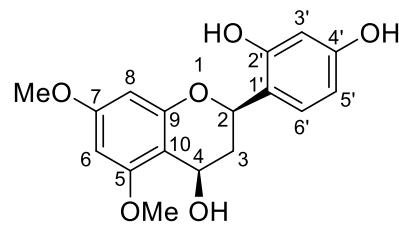 <p style="text-align: center;"><b>9</b></p> | 2                                                                                                                               | 67.4                                           | 117.1556781                     | 127.2923                        |
|                                                                                                                                 | 3                                                                                                                               | 26.7                                           | 159.2900575                     | 169.2824                        |
|                                                                                                                                 | 4                                                                                                                               | 62.1                                           | 132.815813                      | 132.5099                        |
|                                                                                                                                 | 5                                                                                                                               | 159.1                                          | 41.67643849                     | 41.8487                         |
|                                                                                                                                 | 6                                                                                                                               | 91.6                                           | 106.3062955                     | 106.9832                        |
|                                                                                                                                 | 7                                                                                                                               | 161.9                                          | 40.87334304                     | 39.4635                         |
|                                                                                                                                 | 8                                                                                                                               | 92.9                                           | 104.5759509                     | 107.5406                        |
|                                                                                                                                 | 9                                                                                                                               | 154.8                                          | 45.18514977                     | 44.2498                         |
|                                                                                                                                 | 10                                                                                                                              | 103.3                                          | 91.38900668                     | 96.4145                         |
|                                                                                                                                 |  <p style="text-align: center;"><b>8</b></p> | 1'                                             | 114.1                           | 83.8109682                      |
| 2'                                                                                                                              |                                                                                                                                 | 154.7                                          | 43.02193345                     | 44.2371                         |
| 3'                                                                                                                              |                                                                                                                                 | 103.4                                          | 96.85620967                     | 97.2474                         |
| 4'                                                                                                                              |                                                                                                                                 | 157.4                                          | 43.57126478                     | 43.3194                         |
| 5'                                                                                                                              |                                                                                                                                 | 108.2                                          | 93.83536937                     | 93.7141                         |
| 6'                                                                                                                              |                                                                                                                                 | 131.8                                          | 69.61627622                     | 66.6211                         |
| 5-OMe                                                                                                                           |                                                                                                                                 | 55.9                                           | 141.1875069                     | 141.3806                        |
| 7-OMe                                                                                                                           |                                                                                                                                 | 55.3                                           | 141.5587912                     | 141.5492                        |

**Table 3.** Experimental  $^{13}\text{C}$  NMR data ( $\delta_{\text{C}}$  in ppm) of **9** (proposed in the previous literature, *J. Asian Nat. Prod. Res.*, **2013**, *15*, 979-984) and calculated chemical shifts ( $\delta_{\text{C}}$  in ppm) of **9** and **8** with STS strategy

| No.   | Exptl. | Cald. <b>9</b>    | dev   | Cald. <b>8</b>    | dev     |
|-------|--------|-------------------|-------|-------------------|---------|
| 2     | 67.4   | 76.37             | 8.97  | 68.68             | 1.28    |
| 3     | 26.7   | 30.57             | 3.87  | 24.98             | 1.72    |
| 4     | 62.1   | 59.35             | 2.75  | 63.25             | 1.15    |
| 5     | 159.1  | 158.61            | 0.49  | 157.80            | 1.30    |
| 6     | 91.6   | 93.01             | 1.41  | 94.52             | 2.92    |
| 7     | 161.9  | 159.45            | 2.45  | 160.17            | 1.73    |
| 8     | 92.9   | 94.72             | 1.82  | 94.00             | 1.10    |
| 9     | 154.8  | 154.97            | 0.17  | 155.42            | 0.62    |
| 10    | 103.3  | 107.01            | 3.71  | 103.57            | 0.27    |
| 1'    | 114.1  | 114.87            | 0.77  | 114.33            | 0.23    |
| 2'    | 154.7  | 157.22            | 2.52  | 155.43            | 0.73    |
| 3'    | 103.4  | 102.33            | 1.07  | 103.72            | 0.32    |
| 4'    | 157.4  | 156.65            | 0.75  | 156.34            | 1.06    |
| 5'    | 108.2  | 105.31            | 2.89  | 107.06            | 1.14    |
| 6'    | 131.8  | 129.21            | 2.59  | 132.65            | 0.85    |
| 5-OMe | 55.9   | 50.68             | 5.22  | 54.43             | 1.47    |
| 7-OMe | 55.3   | 50.27             | 5.03  | 54.25             | 1.05    |
|       |        | MAE               | 2.73  | MAE               | 1.11    |
|       |        | RMS               | 3.47  | RMS               | 1.28    |
|       |        | $P_{\text{mean}}$ | 0.56% | $P_{\text{mean}}$ | 39.26%  |
|       |        | $P_{\text{rel}}$  | 0.00% | $P_{\text{rel}}$  | 100.00% |

## 5. The Copies of the NMR Spectra

Figure 1.  $^1\text{H}$  NMR Spectrum (500 MHz,  $\text{DMSO-}d_6$ ) of Flavan 1

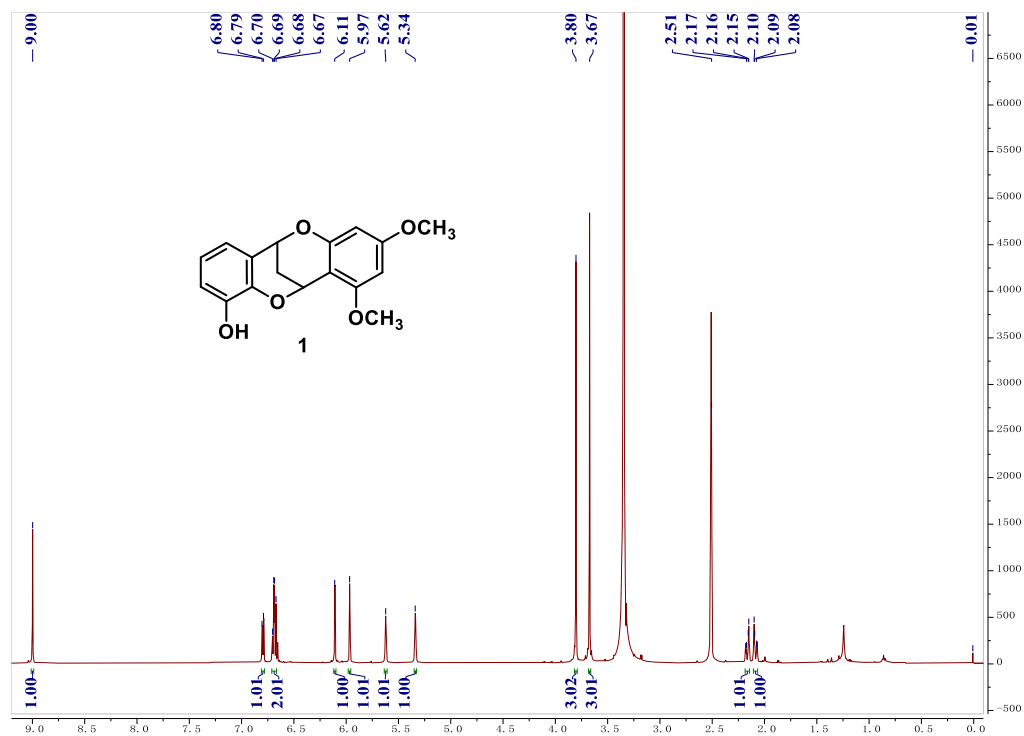

Figure 2.  $^{13}\text{C}$  NMR Spectrum (125 MHz,  $\text{DMSO-}d_6$ ) of Flavan 1

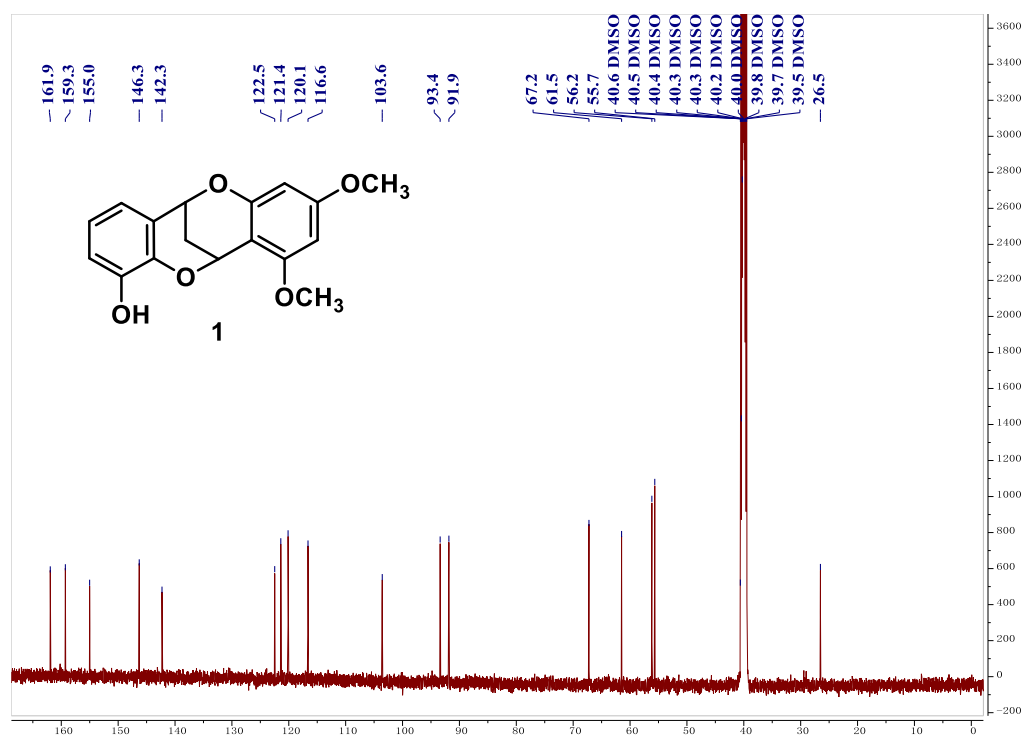

**Figure 3. HSQC Spectrum of Flavan 1**

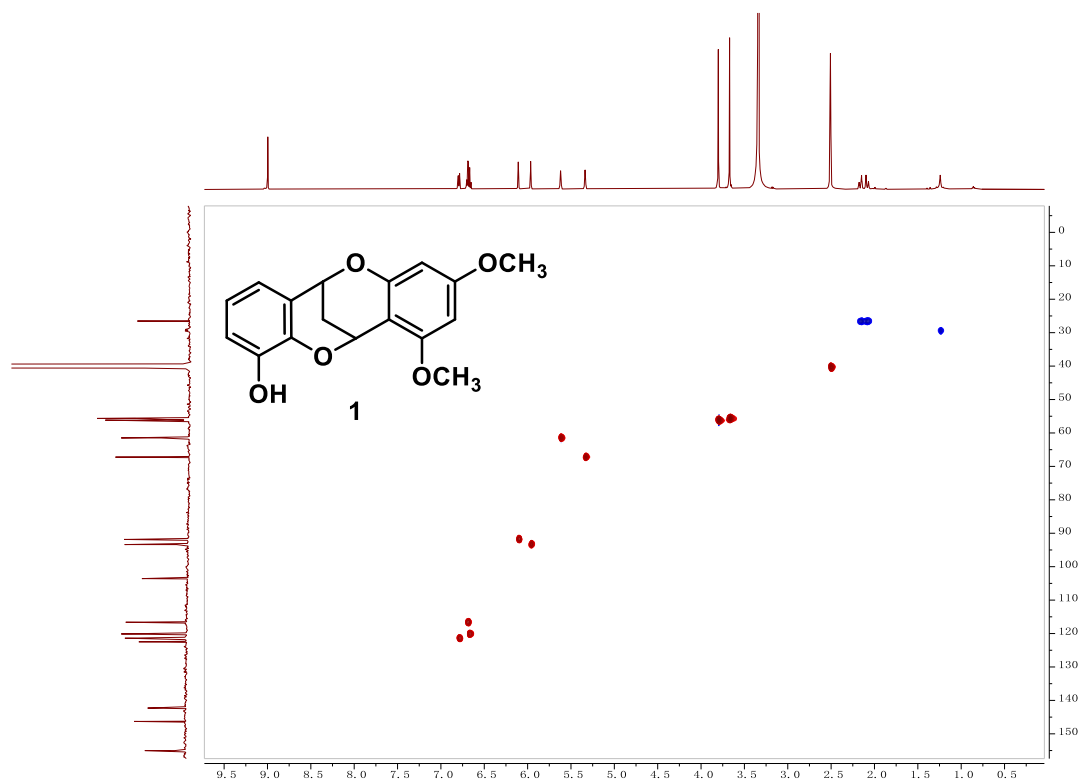

**Figure 4.  $^1\text{H}$ - $^1\text{H}$  COSY Spectrum of Flavan 1**

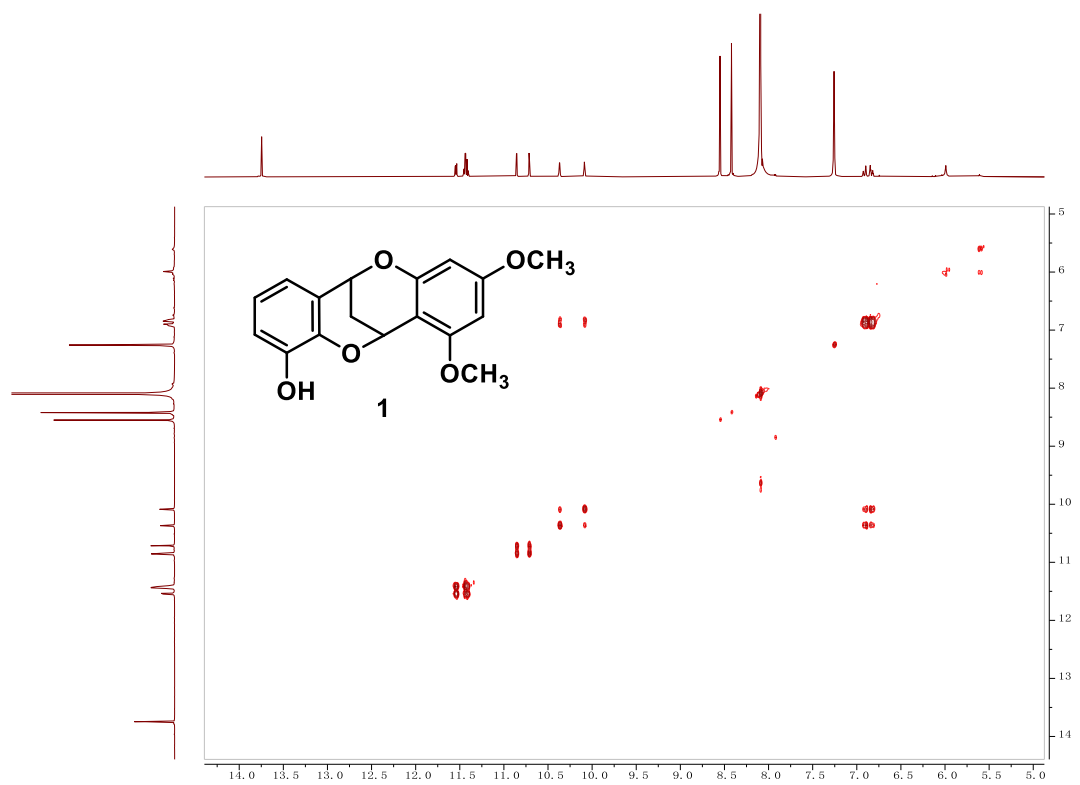



**Figure 5. HMBC Spectrum of Flavan 1**

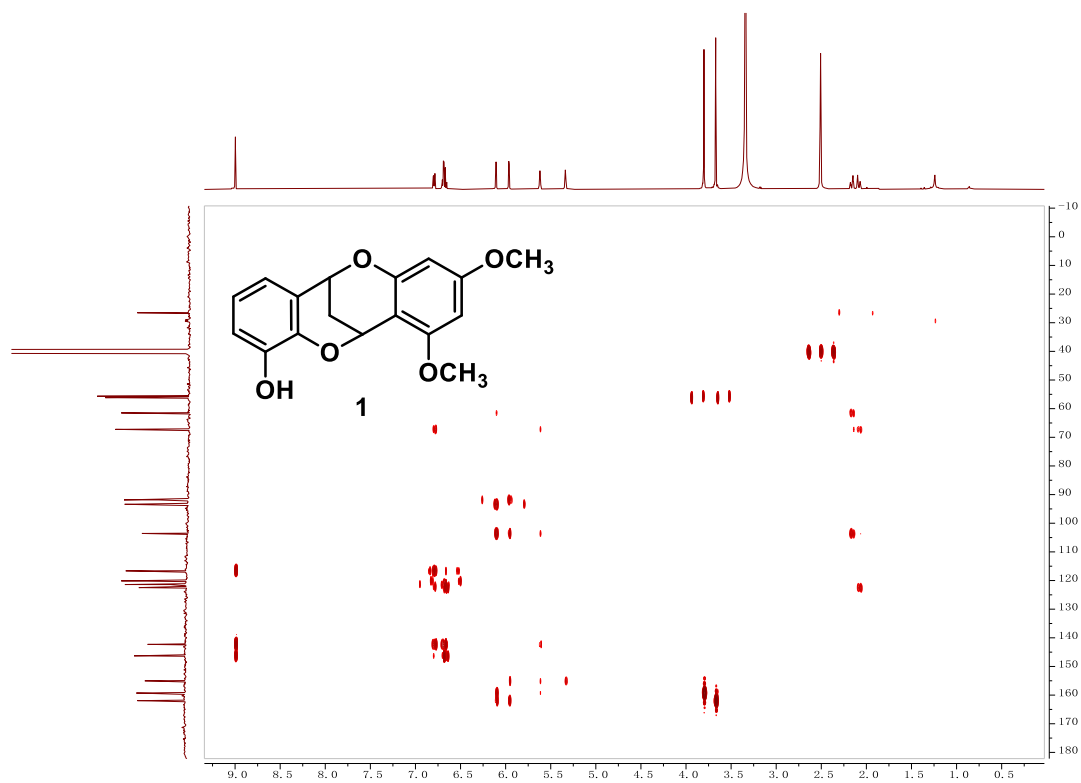

**Figure 6. NOESY Spectrum of Flavan 1**

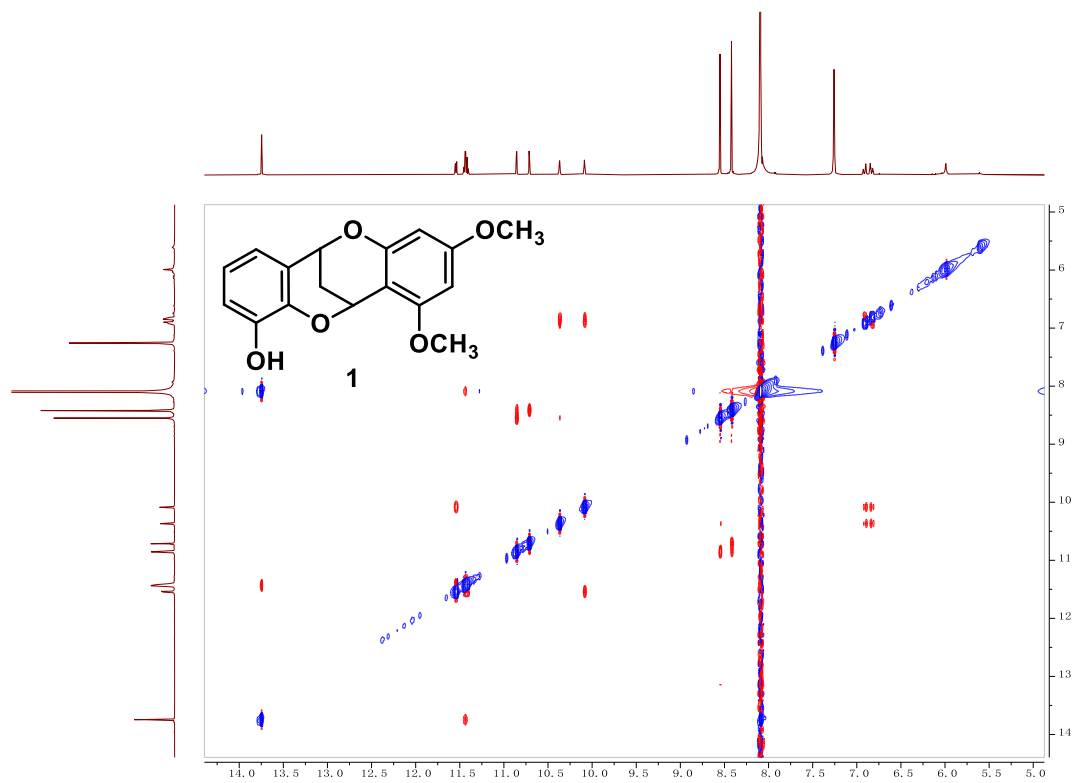

Figure 7. <sup>1</sup>H NMR Spectrum (500 MHz, CDCl<sub>3</sub>) of Flavan 8

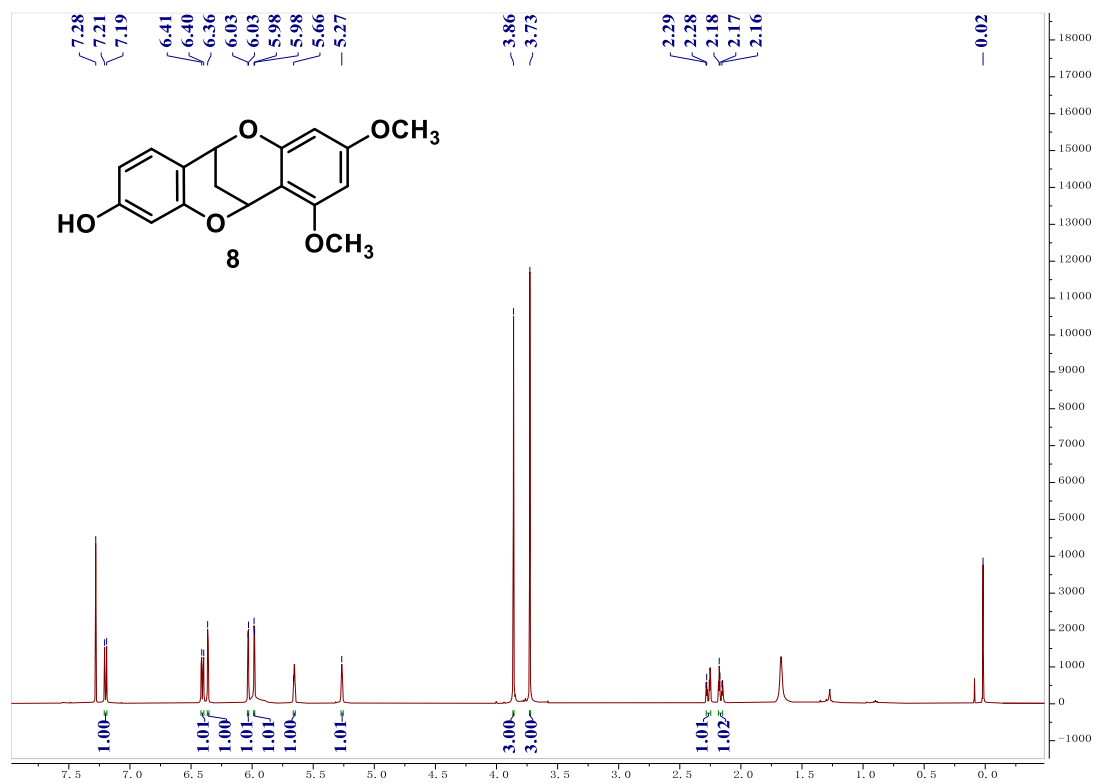

Figure 8. <sup>13</sup>C NMR Spectrum (125 MHz, CDCl<sub>3</sub>) of Flavan 8

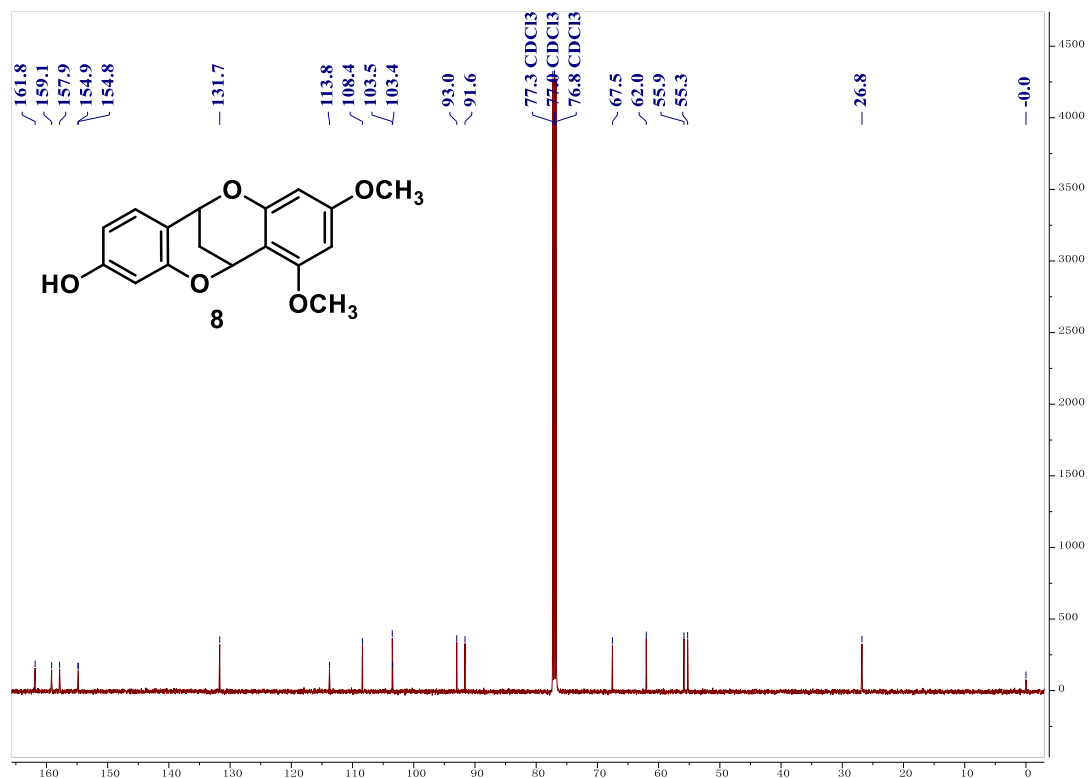

**Figure 9. HSQC Spectrum of Flavan 8**

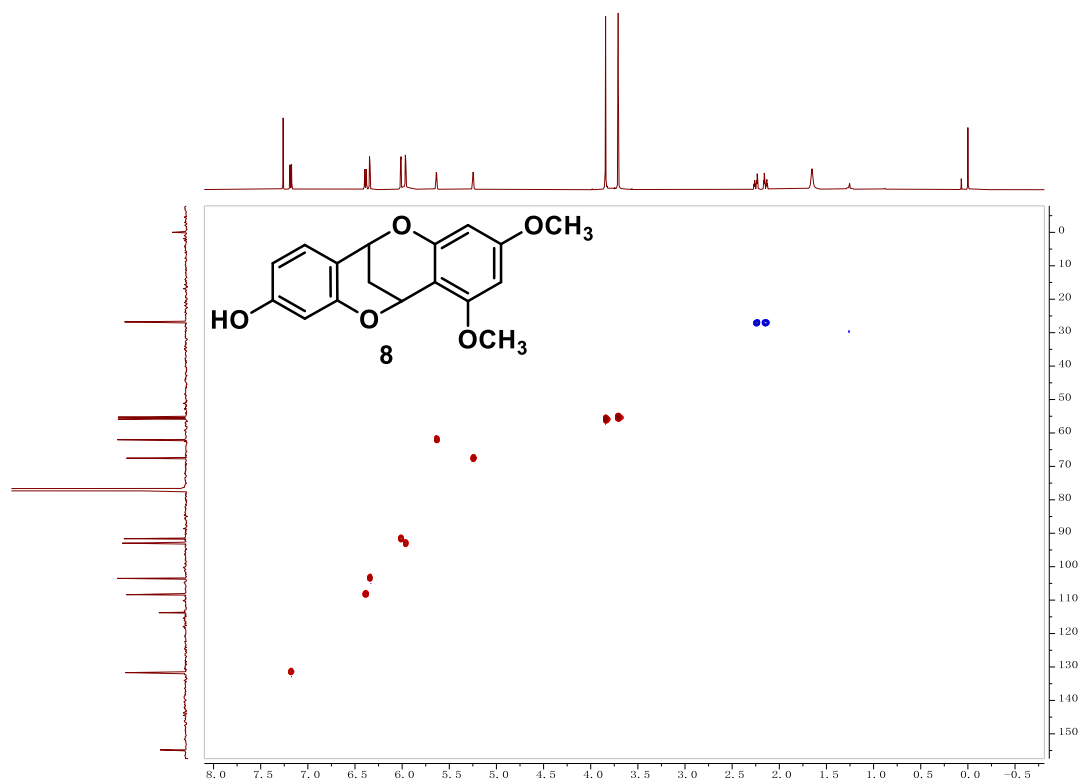

**Figure 10.  $^1\text{H}$ - $^1\text{H}$  COSY Spectrum of Flavan 8**

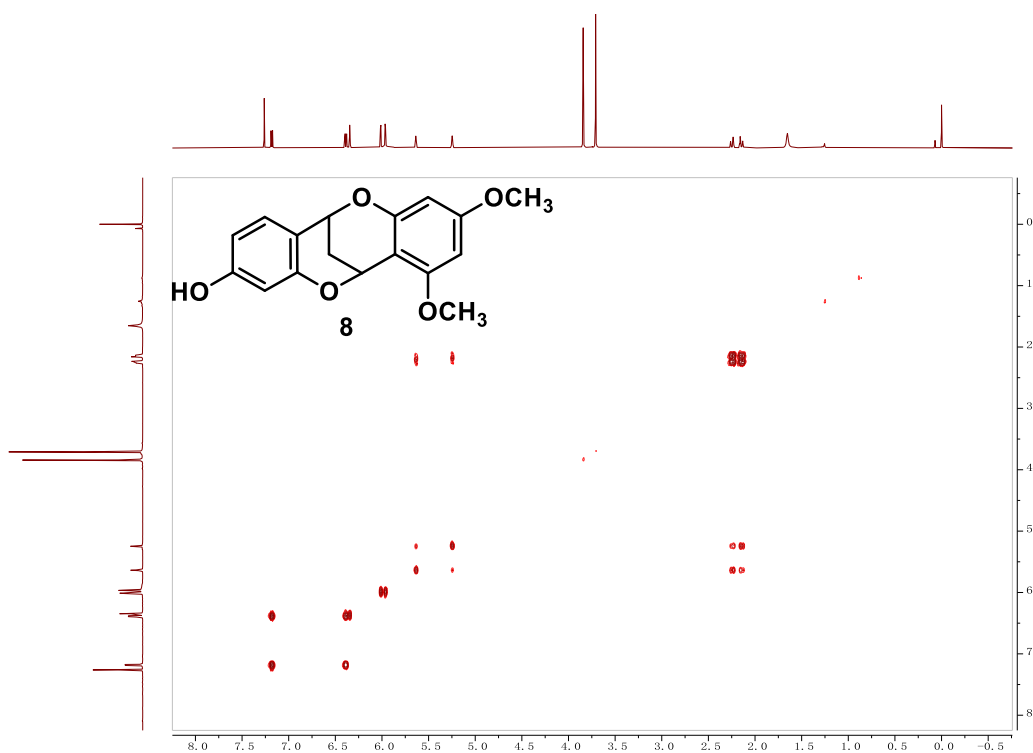

**Figure 11. HMBC Spectrum of Flavan 8**

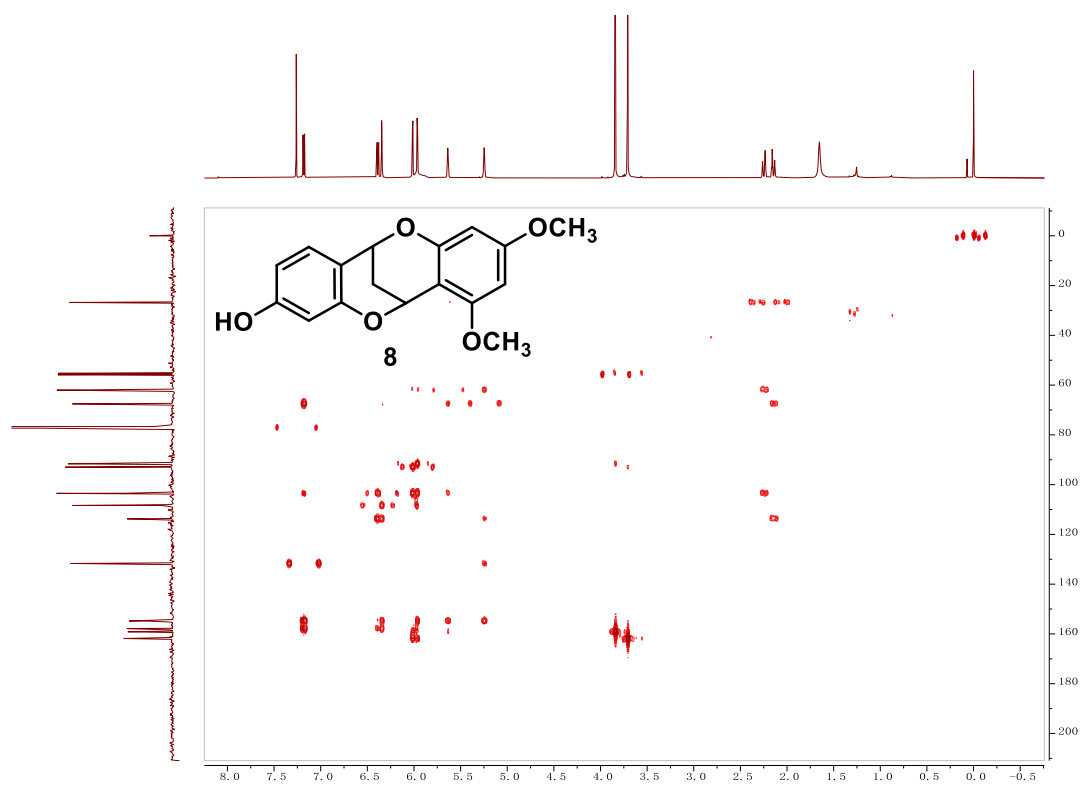

**Figure 12. NOESY Spectrum of Flavan 8**

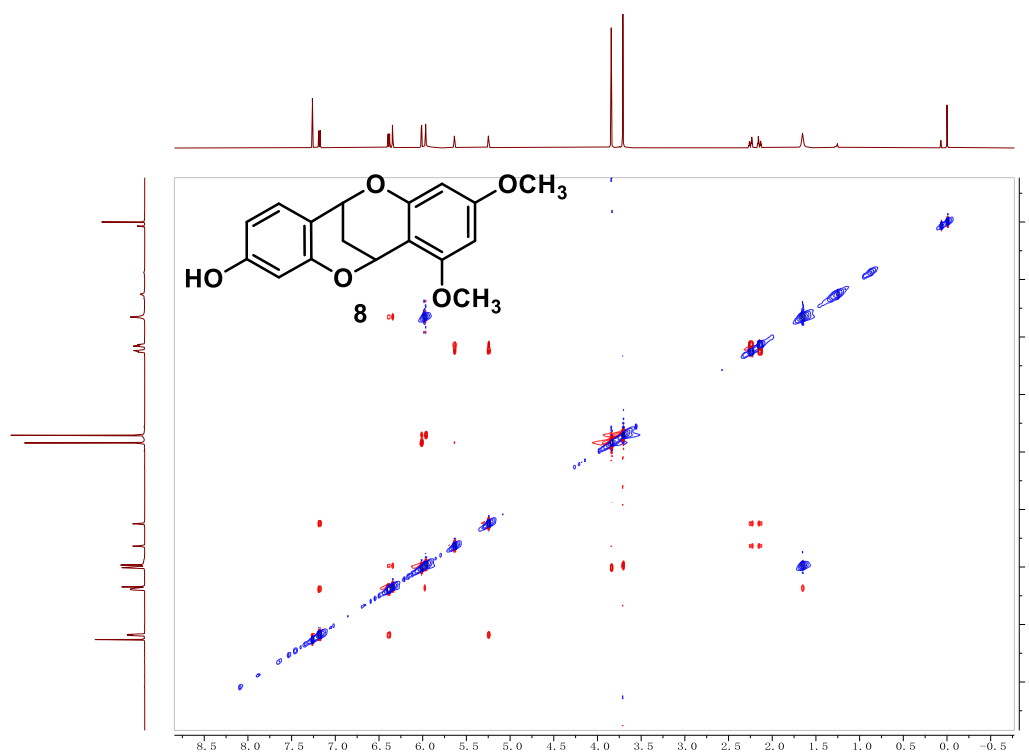

Figure 13.  $^1\text{H}$  NMR Spectrum (500 MHz,  $\text{CDCl}_3$ ) of Compound 17c

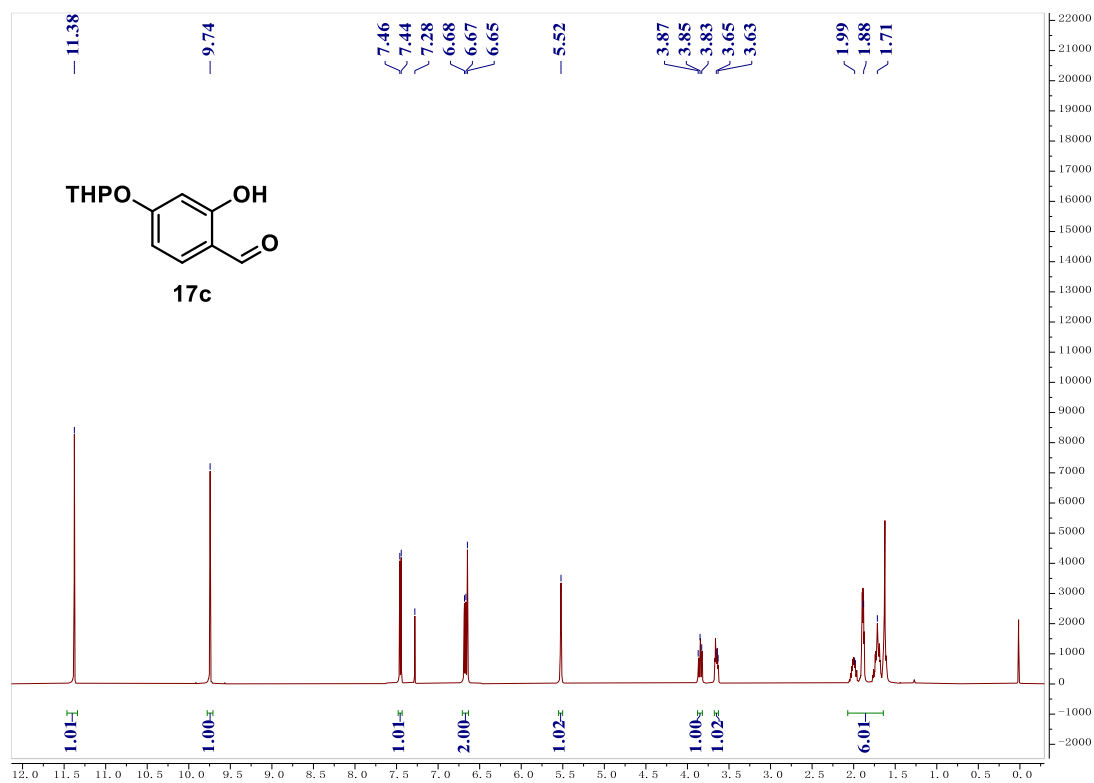

Figure 14.  $^{13}\text{C}$  NMR Spectrum (125 MHz,  $\text{CDCl}_3$ ) of Compound 17c

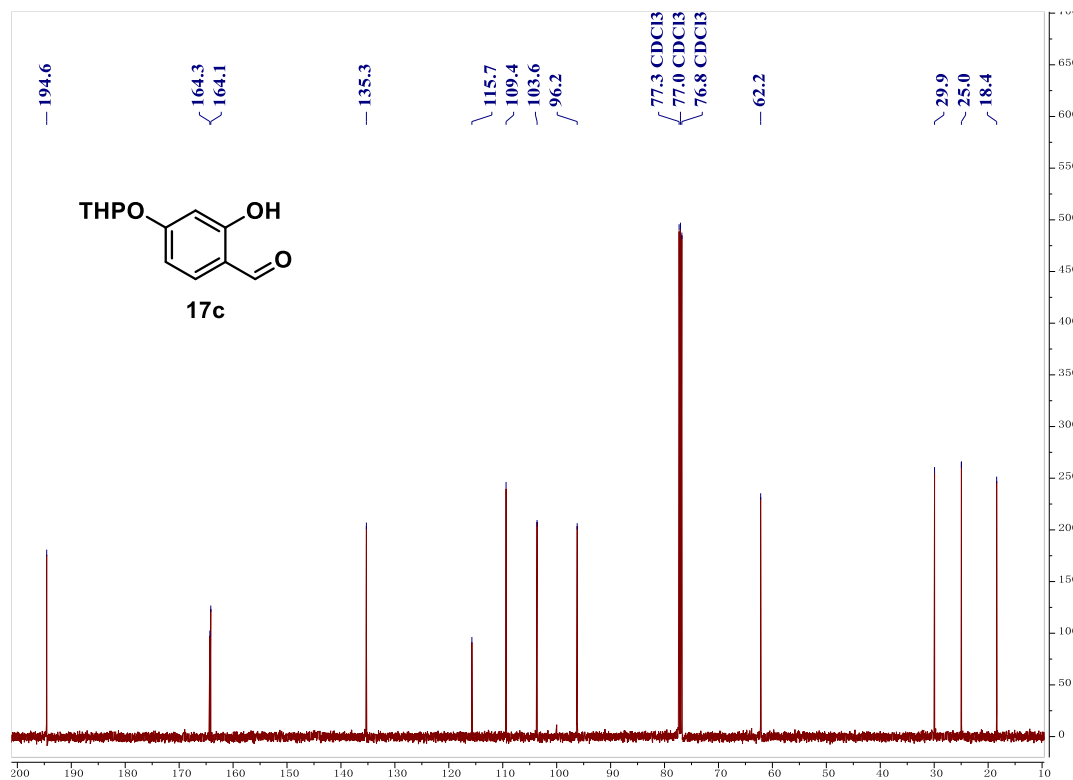

Figure 15.  $^1\text{H}$  NMR Spectrum (500 MHz,  $\text{CDCl}_3$ ) of Compound 18c

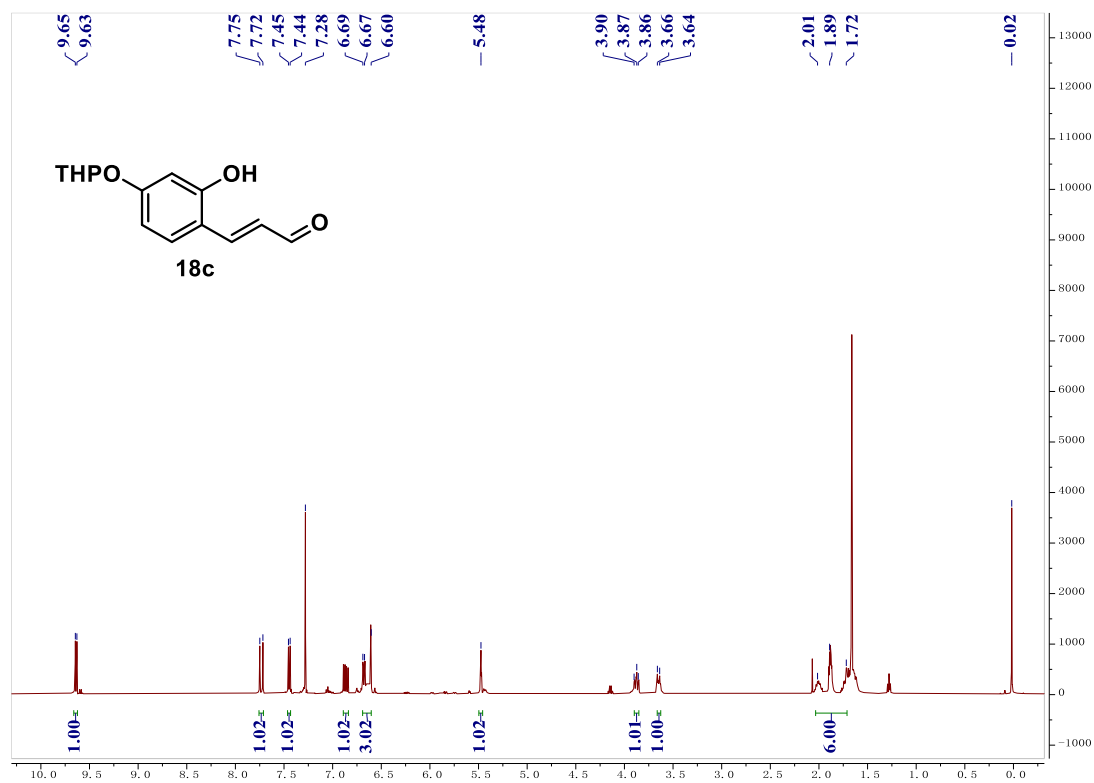

Figure 16.  $^{13}\text{C}$  NMR Spectrum (125 MHz,  $\text{CD}_3\text{OD}$ ) of Compound 18c

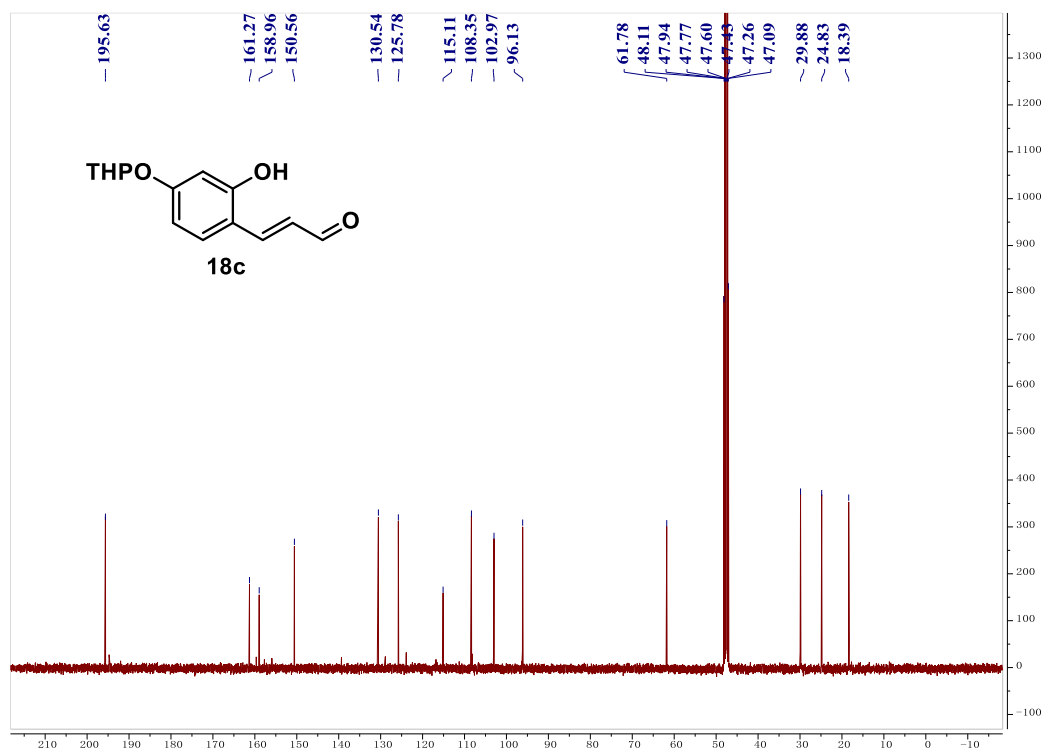

Figure 17.  $^1\text{H}$  NMR Spectrum (500 MHz,  $\text{CD}_3\text{OD}$ ) of Compound 12

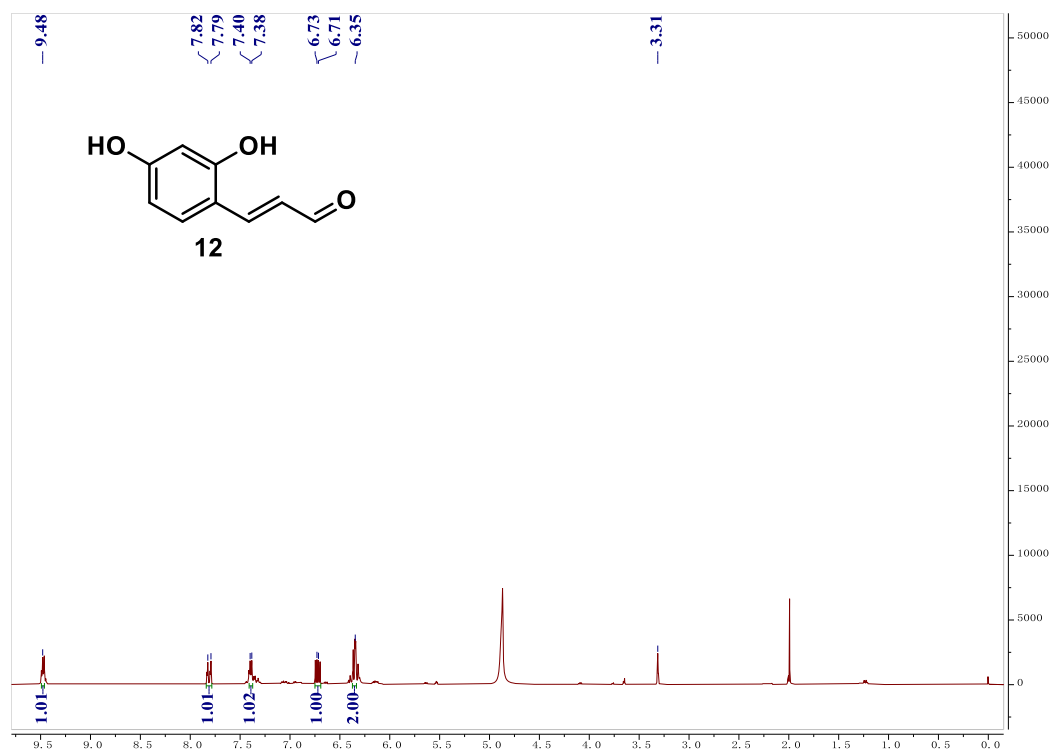

Figure 18.  $^{13}\text{C}$  NMR Spectrum (125 MHz,  $\text{CD}_3\text{OD}$ ) of Compound 12

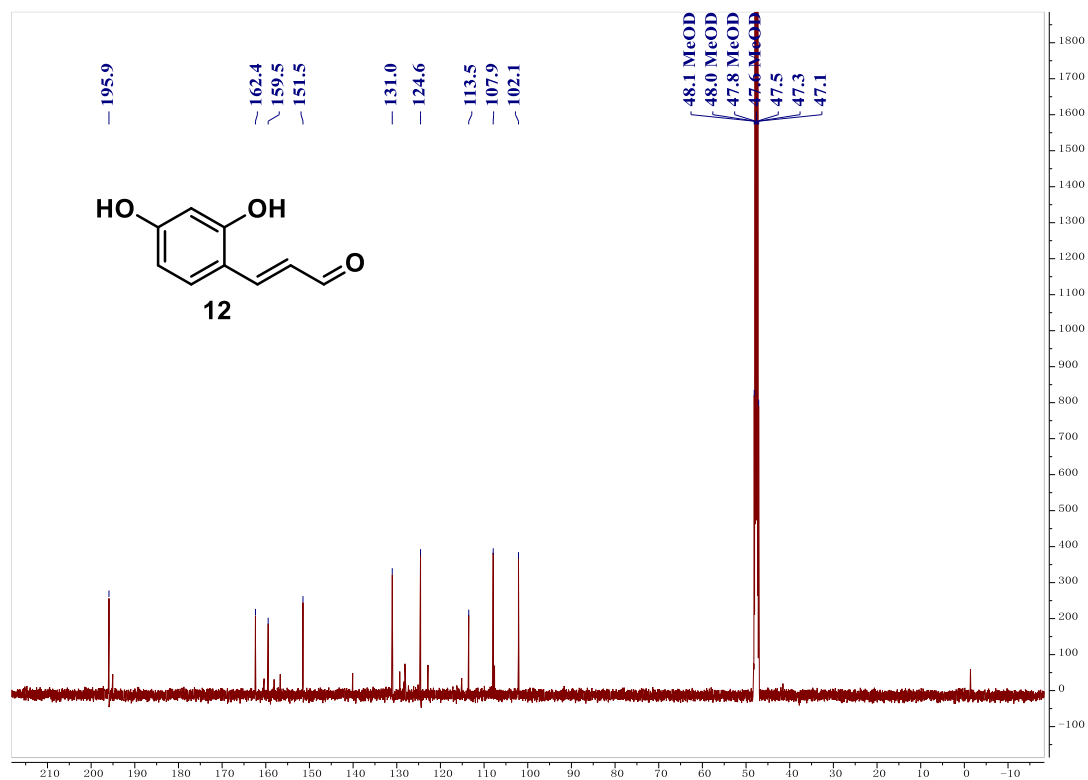

Figure 19.  $^1\text{H}$  NMR Spectrum (500 MHz,  $\text{CD}_3\text{OD}$ ) of Compound 11

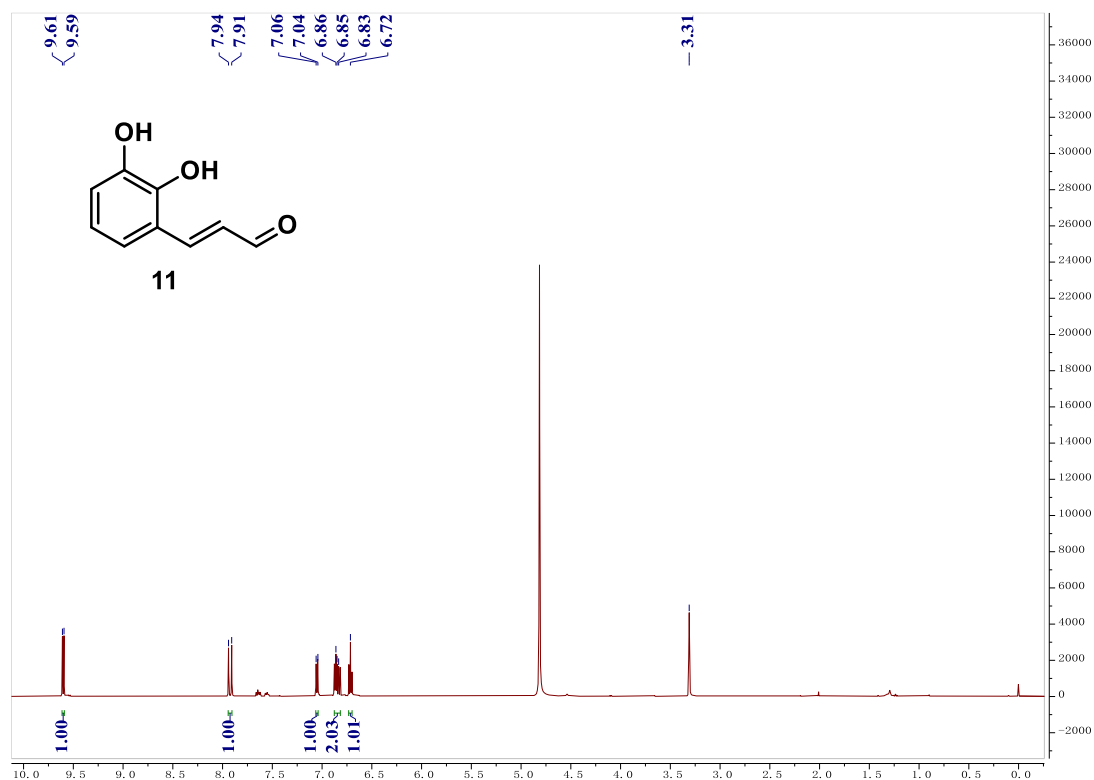

Figure 20.  $^{13}\text{C}$  NMR Spectrum (125 MHz,  $\text{CD}_3\text{OD}$ ) of Compound 11

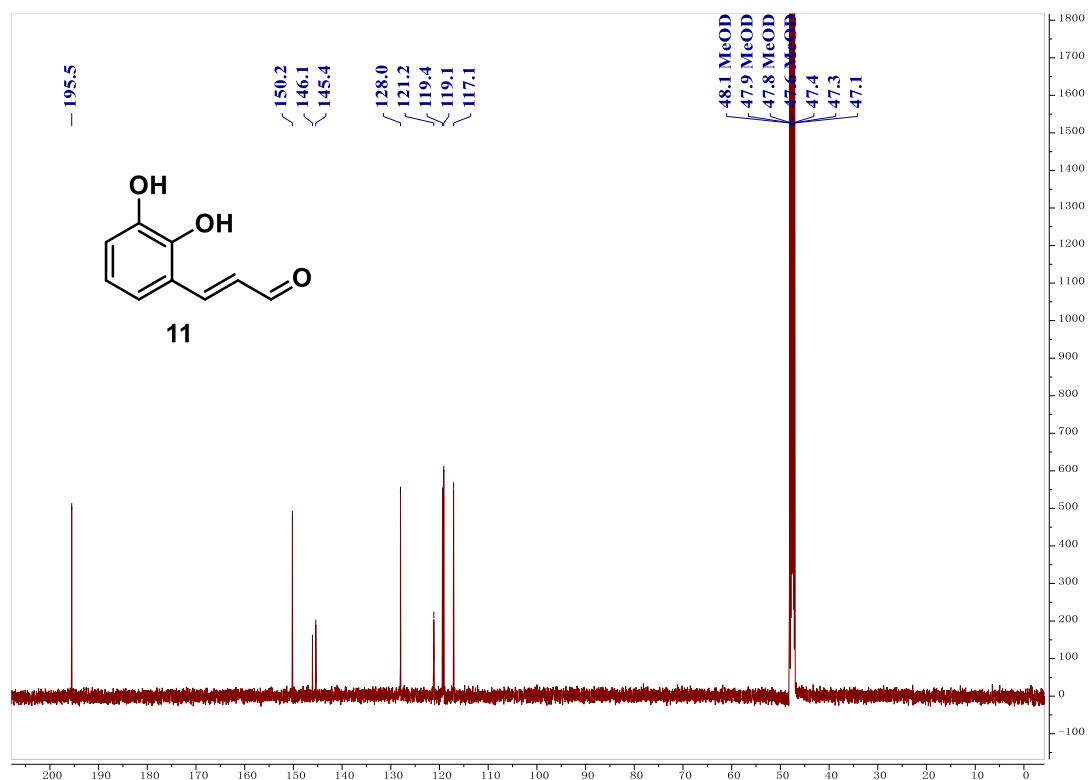

Supplement: d2ob00634k1.pdf [file d2ob00634k1.pdf]
